# Supplementary material
Source: HighWire-hosted journal article supplement (https://bjo.bmj.com/content/104/12/1748)

Supplemental Figure 4: Forest plot of prevalence of MMD among high myopia subjects

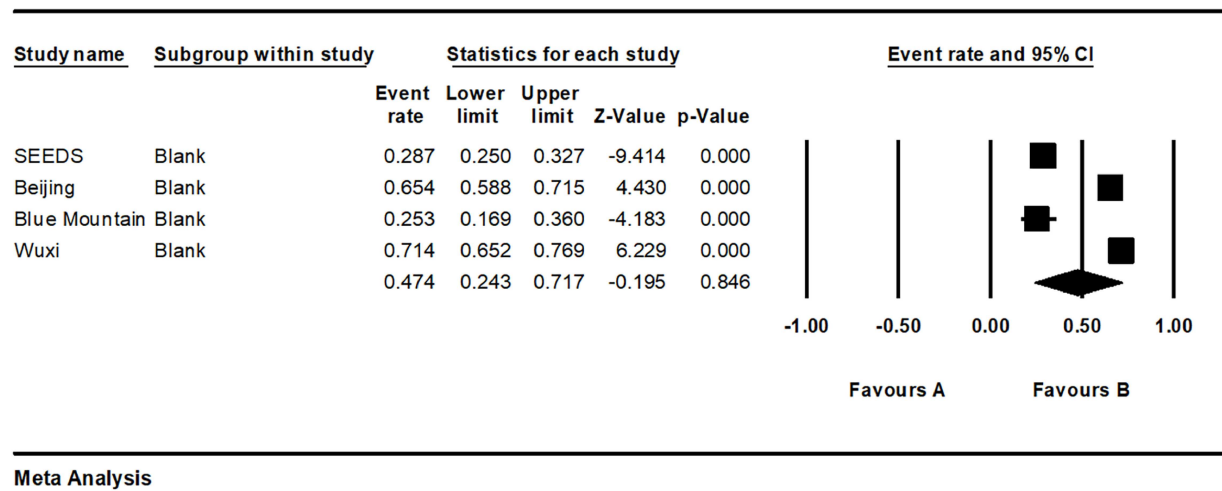

Supplement: inline-supplementary-material-4 [file inline-supplementary-material-4.pdf]

Supplemental Figure 7: Forest plot of prevalence of MMD by region

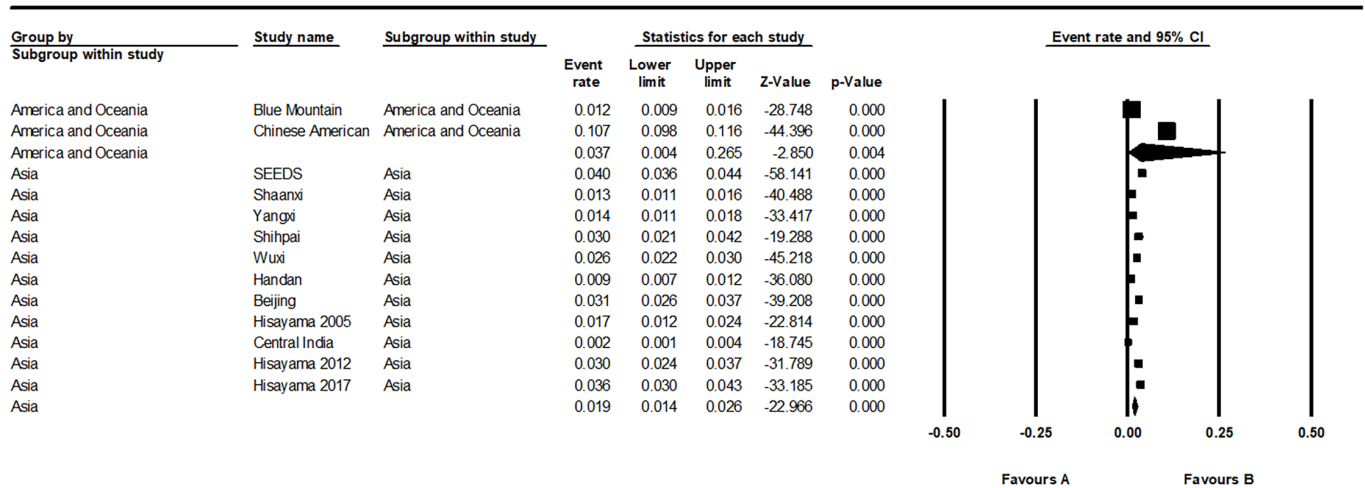

Meta Analysis

Supplement: inline-supplementary-material-7 [file inline-supplementary-material-7.pdf]
